## CORRECTION

# Correction: Efficient and secure three-party mutual authentication key agreement protocol for WSNs in IoT environments

Chi-Tung Chen, Cheng-Chi Lee, Iuon-Chang Lin

There are errors in the author affiliations. The correct affiliations are as follows:

Chi-Tung Chen<sup>1</sup>, Cheng-Chi Lee<sup>3,4</sup>, Iuon-Chang Lin<sup>2,4</sup>

**1** Department of Distribution Management (Information Management), National Chin-Yi University of Technology, Taichung, Taiwan, R.O.C. **2** Department of Library and Information Science, Research and Development Center for Physical Education, Health, and Information Technology, Fu Jen Catholic University, New Taipei City, Taiwan, R.O.C. **3** Department of Photonics and Communication Engineering, Asia University, Taichung, Taiwan, R.O.C. **4** Department of Management Information Systems, National Chung Hsing University, Taichung, Taiwan, R.O.C.

There is an error in Fig 4. Part of the figure is missing. Please see the complete, correct Fig 4 here.

There are errors in the typesetting of the columns in Tables 3 and 4. Please see the correct Tables 3 and 4 here.

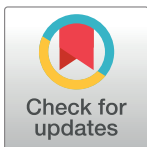

## OPEN ACCESS

**Citation:** Chen C-T, Lee C-C, Lin I-C (2020)

Correction: Efficient and secure three-party mutual authentication key agreement protocol for WSNs in IoT environments. PLoS ONE 15(6): e0234631. <https://doi.org/10.1371/journal.pone.0234631>

**Published:** June 12, 2020

**Copyright:** © 2020 Chen et al. This is an open access article distributed under the terms of the [Creative Commons Attribution License](https://creativecommons.org/licenses/by/4.0/), which permits unrestricted use, distribution, and reproduction in any medium, provided the original author and source are credited.

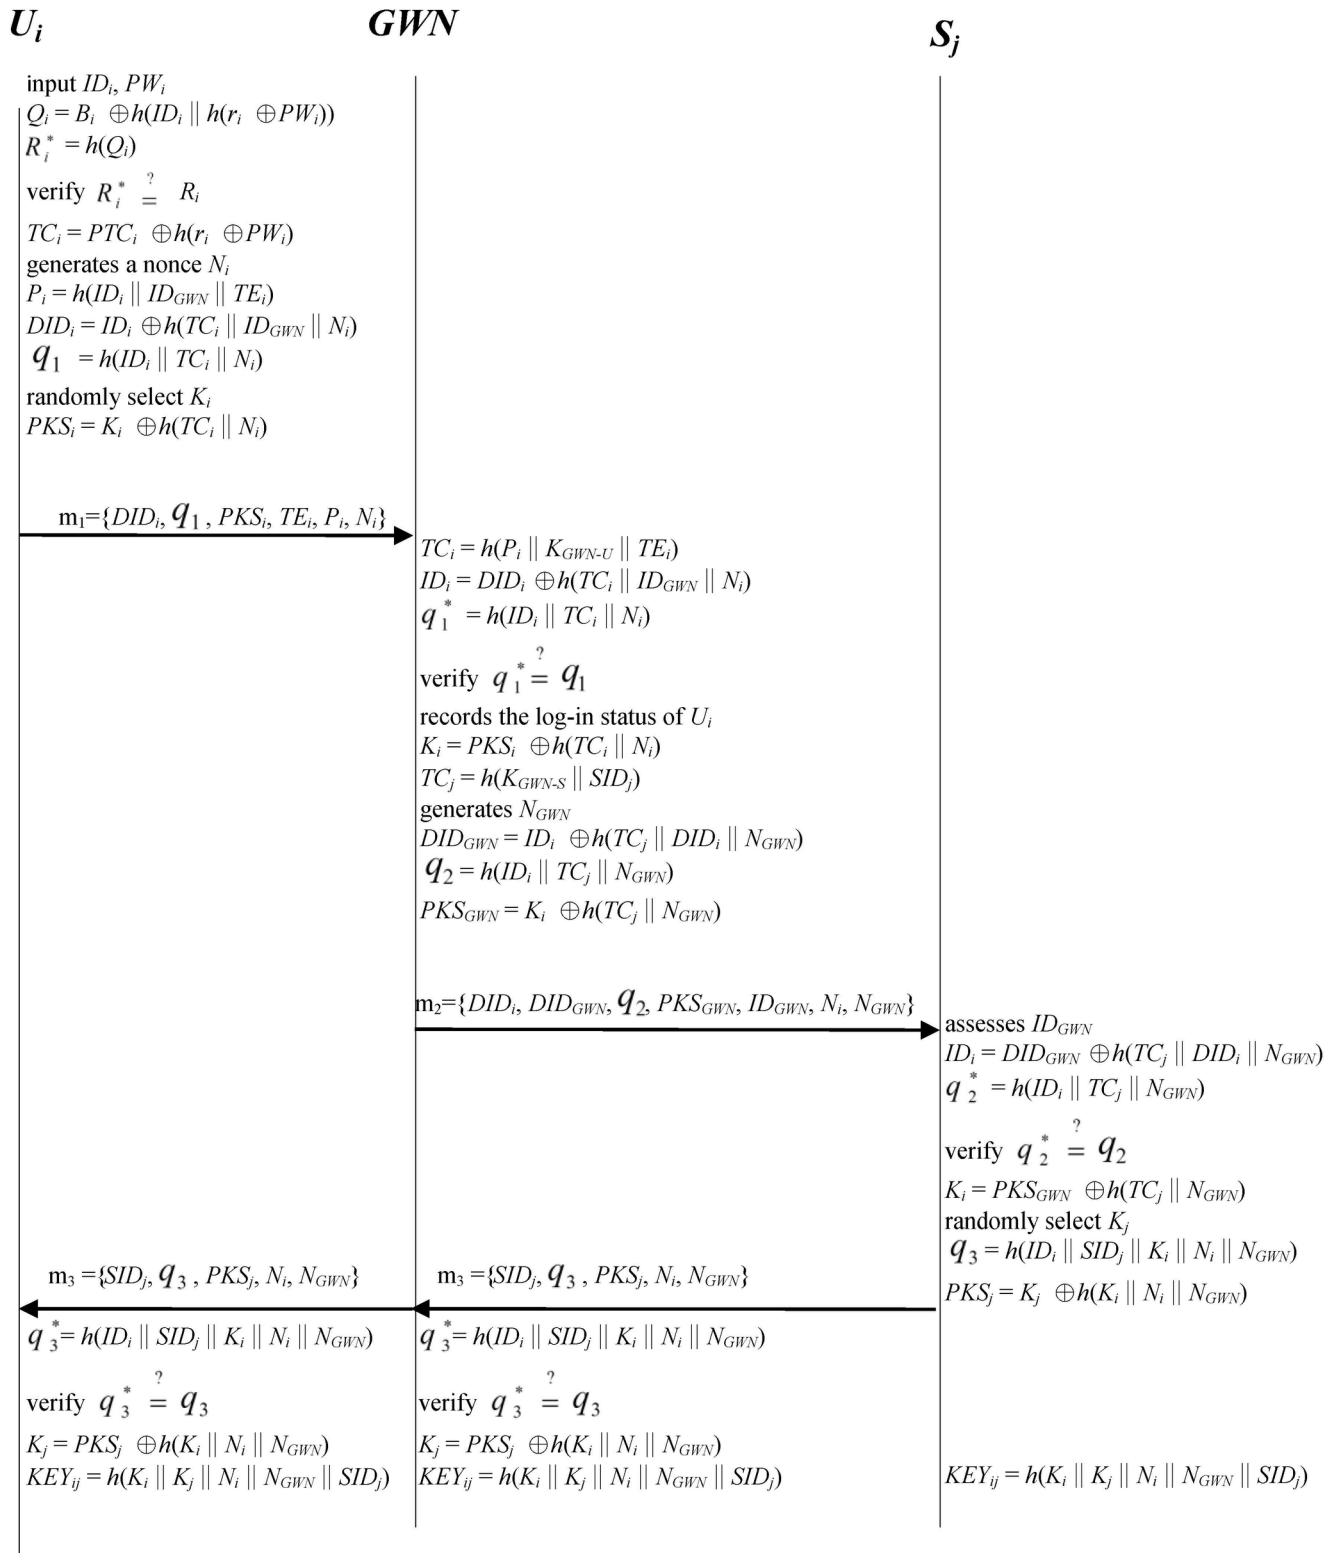

**Fig 4. Login phase; authentication and key agreement phase.**

<https://doi.org/10.1371/journal.pone.0234631.g001>

**Table 3. Functionality comparison of our scheme with other related schemes.**

|                                     | Ours | Ostad-Sharif (2019)[2] | Amin et al. (2018)[26] | Chang et al. (20160)[27] | Xue et al. (2103)[7] | Yeh et al. (2011)[8] | Khan et al. (2010)[24] | Chen et al. (2010)[25] | Das (2009)[5] |
|-------------------------------------|------|------------------------|------------------------|--------------------------|----------------------|----------------------|------------------------|------------------------|---------------|
| Password protection                 | Yes  | Yes                    | Yes                    | No                       | No                   | Yes                  | Yes                    | No                     | No            |
| Stolen smart card attack resistance | Yes  | Yes                    | Yes                    | No                       | No                   | No                   | No                     | No                     | No            |
| Masquerade attack resistance        | Yes  | Yes                    | Yes                    | No                       | Yes                  | Yes                  | Yes                    | No                     | No            |
| Replay attacks resistance           | Yes  | Yes                    | Yes                    | No                       | Yes                  | No                   | Yes                    | Yes                    | Yes           |
| Insider attack resistance           | Yes  | Yes                    | Yes                    | Yes                      | No                   | Yes                  | Yes                    | No                     | No            |
| Password updating/changing          | Yes  | No                     | Yes                    | Yes                      | No                   | No                   | Yes                    | No                     | No            |
| Time synchronization avoidance      | Yes  | No                     | No                     | No                       | No                   | Yes                  | No                     | No                     | No            |
| Mutual authentication               | Yes  | No                     | Yes                    | Yes                      | Yes                  | Yes                  | Yes                    | Yes                    | No            |
| Session key agreement               | Yes  | Yes                    | Yes                    | Yes                      | Yes                  | Yes                  | No                     | No                     | No            |
| User anonymity                      | Yes  | Yes                    | Yes                    | No                       | Yes                  | No                   | Yes                    | Yes                    | Yes           |
| GWN bypassing attack resistance     | Yes  | Yes                    | Yes                    | Yes                      | Yes                  | Yes                  | No                     | No                     | No            |

<https://doi.org/10.1371/journal.pone.0234631.t001>

**Table 4. Performance comparison of our scheme with other related schemes.**

|                               | Ours    | Ostad-Sharif (2019)[2] | Amin et al. (2018)[26] | Chang et al. (20160)[27] | Xue et al. (2103)[7] | Yeh et al. (2011)[8] | Khan et al. (2010)[24] | Chen et al. (2010)[25] | Das (2009)[5] |
|-------------------------------|---------|------------------------|------------------------|--------------------------|----------------------|----------------------|------------------------|------------------------|---------------|
| <b>【 Computational cost 】</b> |         |                        |                        |                          |                      |                      |                        |                        |               |
| <i>Authentication phase</i>   |         |                        |                        |                          |                      |                      |                        |                        |               |
| User                          | $4T_h$  | $10T_h$                | $13T_h$                | $3T_h$                   | $5T_h$               | $2T_{ecc}+1T_h$      | $3T_h$                 | $4T_h$                 | $3T_h$        |
| GWN                           | $8T_h$  | $14T_h$                | $14T_h$                | $5T_h$                   | $11T_h$              | $4T_{ecc}+3T_h$      | $5T_h$                 | $5T_h$                 | $4T_h$        |
| Sensor Node                   | $3T_h$  | $3T_h$                 | $2T_h$                 | $1T_h$                   | $3T_h$               | $2T_{ecc}+2T_h$      | $2T_h$                 | $2T_h$                 | $1T_h$        |
| <i>key agreement phase</i>    |         |                        |                        |                          |                      |                      |                        |                        |               |
| User                          | $3T_h$  | $2T_h$                 | $1T_h$                 | $3T_h$                   | $3T_h$               | $1T_h$               | - *                    | - *                    | - *           |
| GWN                           | $3T_h$  | $3T_h$                 | $3T_h$                 | $3T_h$                   | $3T_h$               | $1T_h$               | - *                    | - *                    | - *           |
| Sensor Node                   | $3T_h$  | $2T_h$                 | $2T_h$                 | $4T_h$                   | $3T_h$               | $1T_h$               | - *                    | - *                    | - *           |
| Total                         | $24T_h$ | $34T_h$                | $35T_h$                | $19T_h$                  | $28T_h$              | $8T_{ecc}+9T_h$      |                        |                        |               |
| <b>【 Communication cost 】</b> |         |                        |                        |                          |                      |                      |                        |                        |               |
| Transmitted message           | 4       | 6                      | 6                      | 4                        | 4                    | 3                    | 4                      | 4                      | 3             |

\* Khan et al. scheme, Chen et al. scheme and Das scheme do not provide the key agreement phase for session key agreement.

<https://doi.org/10.1371/journal.pone.0234631.t002>

## Reference

1. Chen C-T, Lee C-C, Lin I-C (2020) Efficient and secure three-party mutual authentication key agreement protocol for WSNs in IoT environments. PLoS ONE 15(4): e0232277. <https://doi.org/10.1371/journal.pone.0232277> PMID: 32353049
